# Supplementary material
Source: PubMed Central journal article supplement (PMC7475163)
Supplement: 12264_2020_544_MOESM1_ESM.pdf [file 12264_2020_544_MOESM1_ESM.pdf]

# Supplemental Materials

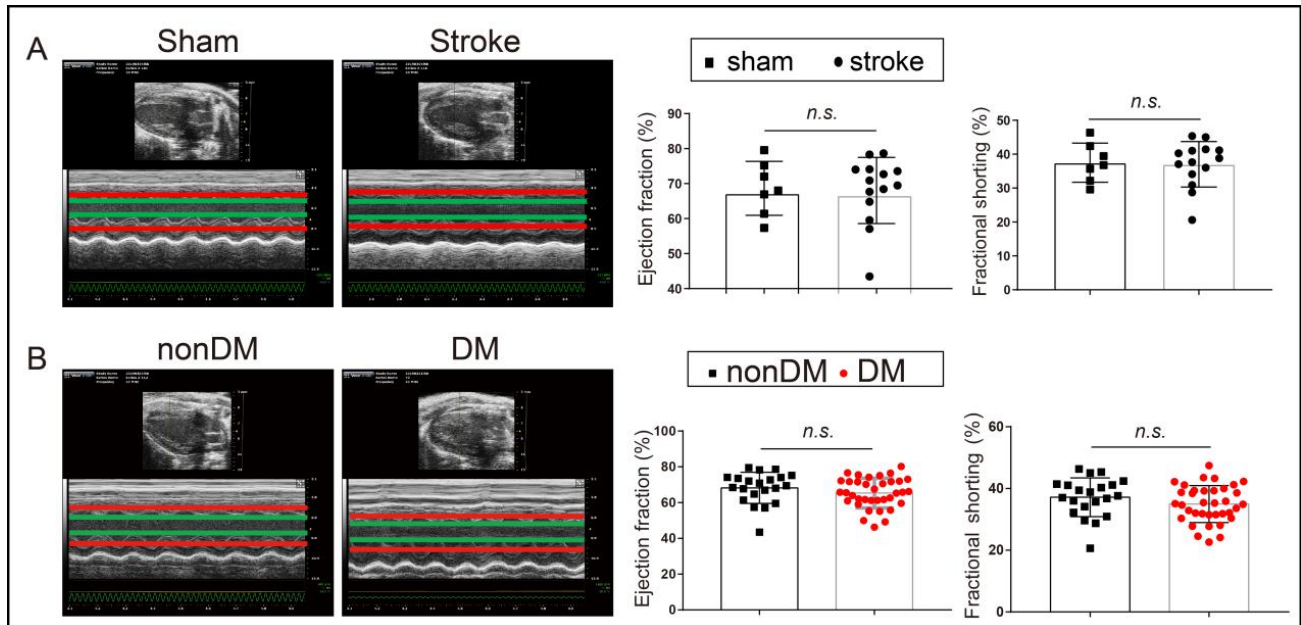

**Fig. S1** Echocardiography before MCAO surgery. **A** Echocardiography in sham ( $n = 7$ ) and stroke ( $n = 14$ ) groups before MCAO or sham operation. **B** Echocardiography in nonDM ( $n = 21$ ) and DM ( $n = 36$ ) groups before MCAO. nonDM, non-diabetic; DM, diabetic group. Data are expressed as mean  $\pm$  SD. Statistical analysis by Student  $t$ -test (for single comparison). n.s.=not significant.

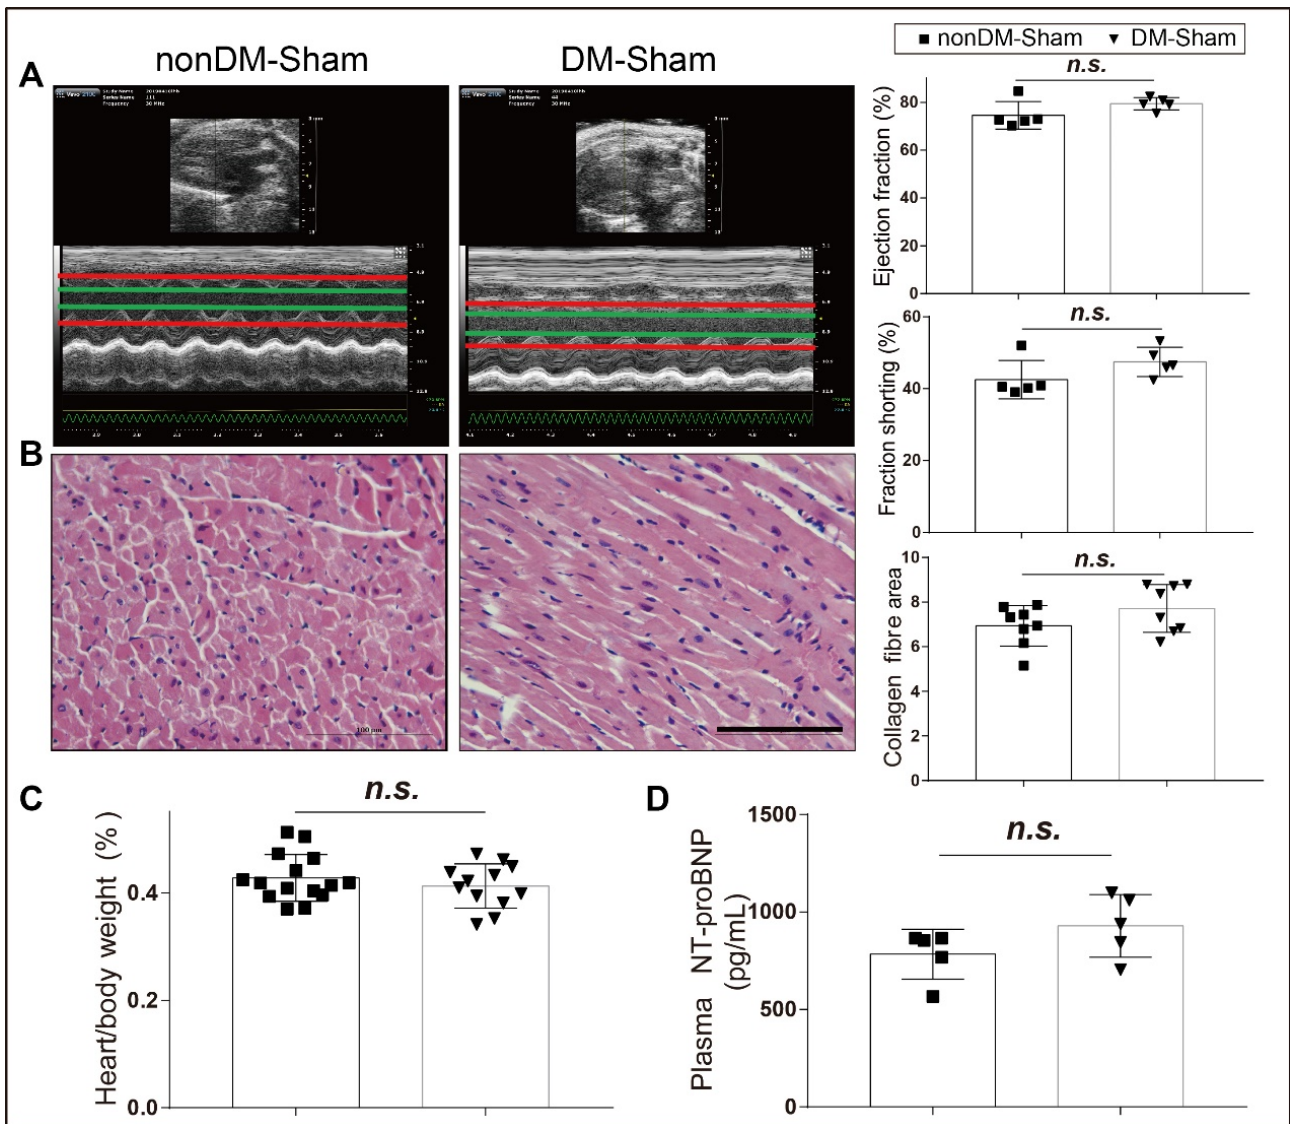

**Fig.S2** Diabetes does not affect cardiac function in sham-operated mice. **A** Echocardiography (left) and ejection fraction and fractional shortening (right) in nonDM-Sham and DM-Sham groups ( $n = 5$  per group). **B** PicroSirius Red staining (left) and collagen fiber area (right) of ventricular tissue in nonDM-Sham and DM-Sham groups ( $n = 8$  per group) (magnification, 400 $\times$ ; scale bar, 100  $\mu$ m) **C** Heart/body weight in nonDM-Sham ( $n = 15$ ) and DM-Sham ( $n = 12$ ) groups. **D** Plasma NT-proBNP levels in nonDM-Sham and DM-Sham groups ( $n = 5$  per group). nonDM-Sham, non-diabetic sham group; DM-Sham, diabetic sham group; Data are expressed as the mean  $\pm$  SD. n.s., not significant (Student's  $t$ -test).

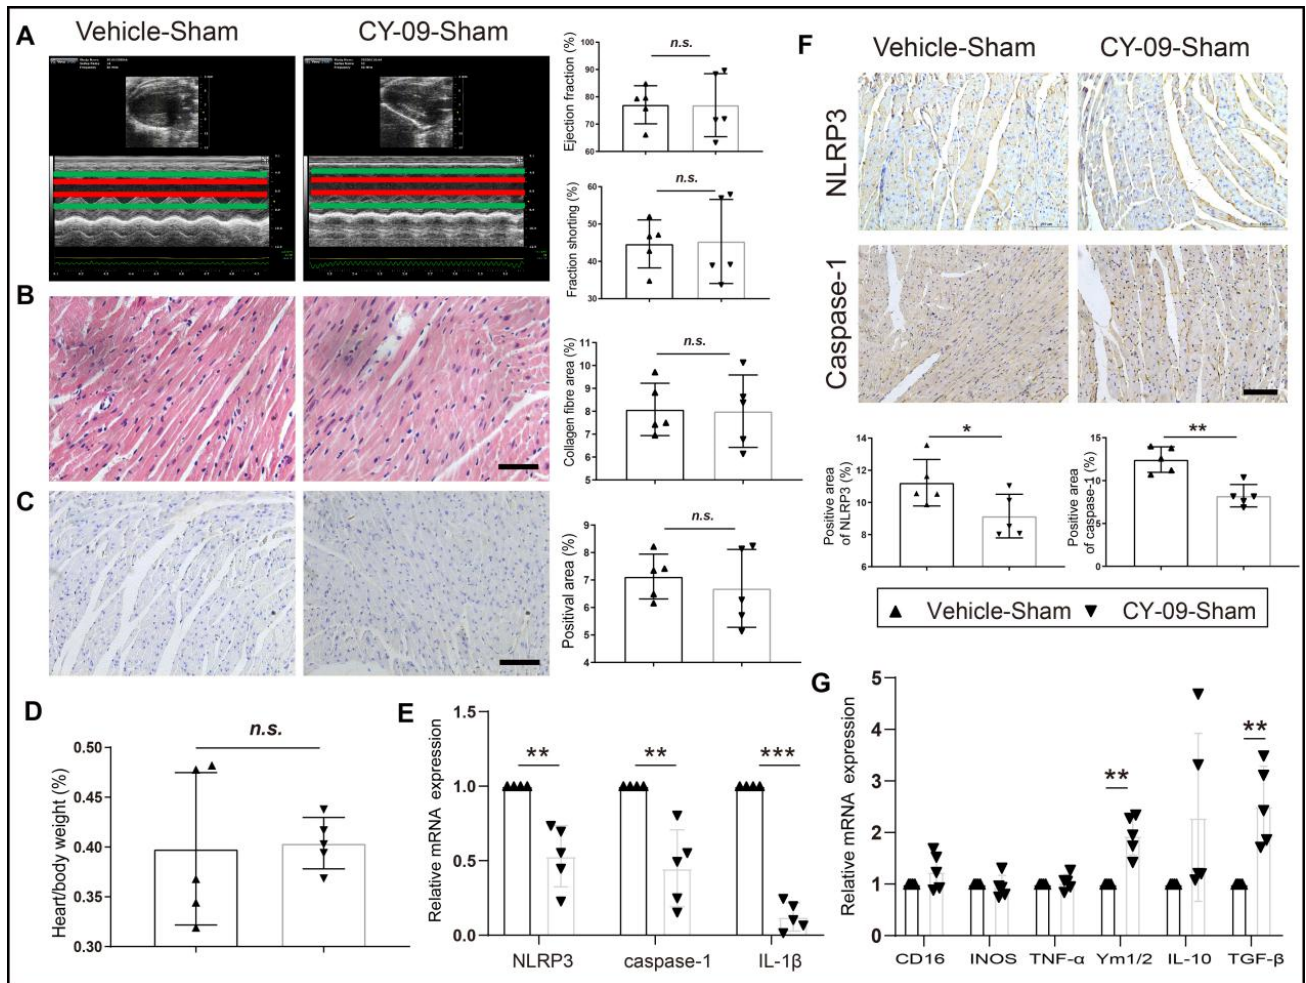

**Fig. S3** CY-09 inhibits NLRP3 in the heart but does not affect cardiac function in sham-operated mice. **A** Echocardiography (left) and ejection fraction and fractional shortening (right) in Vehicle-Sham and CY-09-Sham groups ( $n = 5$  per group). **B** PicroSirius red staining (left) and collagen fiber area (right) in ventricular tissue from Vehicle-Sham and CY-09-Sham mice ( $n = 5$  per group). **C**, **F** Immunohistochemical staining for  $\alpha$ -SMA, NLRP3, and caspase-1 in ventricular tissue from Vehicle-Sham and CY-09-Sham mice ( $n = 5$  per group). **D** Heart/body weight in Vehicle-Sham and CY-09-Sham groups ( $n = 5$  per group). **E**, **G** Relative gene expression of NLRP3, caspase-1, IL-1 $\beta$ , and macrophage polarization markers in apex myocardial tissue.  $\beta$ -Actin served as an endogenous reference gene ( $n = 4$  in Vehicle-Sham and  $n = 5$  in CY-09-Sham). IL, interleukin; INOS, inducible

nitric oxide synthase; TNF- $\alpha$ , tumor necrosis factor alpha; TGF- $\beta$ , transforming growth factor beta.

Data are expressed as the mean  $\pm$  SD. \* $P$  < 0.05, \*\* $P$  < 0.01, \*\*\* $P$  < 0.001, n.s., not significant (Student's  $t$ -test or one-way ANOVA). Magnification, 400 $\times$  in **B**, 200 $\times$  in **C** and **F**; scale bars, 100  $\mu$ m in **B**, 50  $\mu$ m in **C** and **F**.
